# Supplementary material for: Allosteric communication in DNA polymerase clamp loaders relies on a critical hydrogen-bonded junction
Source: eLife journal article supplement (doi:10.7554/elife.66181), 2021-04-13
Supplement: supp [file elife-66181-supp-v1.zip]

Archive with 15 entries (15 files):
- elife_poa_e66181_Transparent_Reporting_File.pdf
- elife_poa_e66181_Figure_3_figure_supplement_1.docx
- elife_poa_e66181_Figure_4_figure_supplement_1.docx
- elife_poa_e66181_Figure_4_figure_supplement_2.docx
- elife_poa_e66181_Figure_4_figure_supplement_3.docx
- elife_poa_e66181_Figure_5_figure_supplement_1.docx
- elife_poa_e66181_Figure_6_figure_supplement_1.docx
- elife_poa_e66181_Figure_6_figure_supplement_2.docx
- elife_poa_e66181_Figure_8_figure_supplement_1.docx
- elife_poa_e66181_Figure_9_figure_supplement_1.docx
- elife_poa_e66181_Figure_9_figure_supplement_2.docx
- elife_poa_e66181_Figure_9_figure_supplement_3.docx
- elife_poa_e66181_Source_Data_1.xlsx
- elife_poa_e66181_Source_Data_2.xlsx
- elife_poa_e66181_Source_Data_3.xlsx
