# Supplementary material for: Allosteric communication in DNA polymerase clamp loaders relies on a critical hydrogen-bonded junction
Source: eLife journal article supplement (doi:10.7554/elife.66181), 2021-04-13
Supplement: supp [file elife-66181-supp-v1.zip › elife_poa_e66181_Figure_8_figure_supplement_1.docx]

| Figure 8 - supplement 1 | |
| --- | --- |
|  |
