# Supplementary material for: Allosteric communication in DNA polymerase clamp loaders relies on a critical hydrogen-bonded junction
Source: eLife journal article supplement (doi:10.7554/elife.66181), 2021-04-13
Supplement: supp [file elife-66181-supp-v1.zip › elife_poa_e66181_Source_Data_1.xlsx]

## Sheet: Sheet1
Position:	1	2	3	4	5	6	7	8	9	10	11	12	13	14	15	16	17	18	19	20	21	22	23	24	25	26	27	28	29	30	31	32	33	34	35	36	37	38	39	40	41	42	43	44	45	46	47	48	49
AA	M	I	T	V	N	E	K	E	H	I	L	E	Q	K	Y	R	P	S	T	I	D	E	C	I	L	P	A	F	D	K	E	T	F	K	S	I	T	S	K	G	K	I	P	H	I	I	L	H	S
E		-2.12743	-0.528733	-0.195215	-0.854885	0	-0.239738	0	NaN	-2.49886	-3	0	-0.823405	-0.302108	-3	-3	-3	0.0664929	0.334006	-1.53158	-0.0339705	0	-3	-3	-2.00457	-0.428569	0.157328	-1.06142	-0.186728	0.127524	0	0.0441417	-3	-0.0998243	-0.0165529	-0.325214	-0.133796	-0.0580476	-0.480432	0.232367	-0.370727	NaN	-3	-3	-3	-2.09945	-3	0.0816018	-3
D		-1.83591	-0.0150514	-2.45574	-0.225304	0.000129692	0.148549	-0.479462	-2.32811	-3	-2.4244	-0.165127	-3	-2.49244	-1.66122	-3	-3	0.0908382	0.125158	-2.49886	0	-0.136699	-2.48309	-2.43146	-2.3848	-0.0234148	-0.406737	0.00623041	0	0.148377	-0.0858269	0.0883524	-3	-0.0773452	0.0492666	-3	0.0347364	-0.0442481	-1.09792	-0.217111	-0.684523	-3	-3	-1.05628	-2.66384	-1.99664	-3	-0.0451071	-3
K		-0.323908	0.190782	0.0140605	-0.238025	-0.14439	0	-0.32296	-1.99269	-3	-0.0492454	-0.304129	-1.52461	0	-3	-0.628371	-2.30172	0.0891366	-0.0597736	-2.54694	0.0211283	-0.183012	-3	-3	-3	-0.261868	0.0663205	-0.252316	-1.20707	0	-0.236243	-0.0218734	-3	0	-0.0989172	-3	-0.665219	-0.0714687	0	-0.0175797	0	-3	-3	-3	-1.969	-2.20526	-2.41697	-0.0812585	-3
R		-0.202014	0.0838936	0.158876	-0.0232904	0.0588033	-0.215357	-2.69537	-0.439157	-3	-0.772297	-2.25543	-0.577324	-0.142265	-2.51345	0	-0.777248	0.113877	0.111654	-2.24735	0.131606	0.0948022	-0.54986	-2.80436	-0.971108	0.0449533	0.123417	0.0157104	-1.25483	0.13282	-0.0750985	-0.0521846	-2.55867	-0.0127115	-0.102624	-2.5162	-0.182427	-0.199444	-0.167087	0.0370251	-0.130866	-2.53718	-0.63808	-0.616779	-3	-2.41754	-2.06485	-0.12883	-3
H		-0.326074	0.0212674	0.171752	-0.0523029	0.104096	-0.0545334	-0.594144	0	-3	-0.452772	0.0254603	-1.08855	-2.56585	-0.450047	-0.387102	-3	0.145171	-0.0740654	-2.59532	-0.228821	0.166209	-2.7028	-2.43598	-1.25738	-0.0978782	0.0990764	0.0685629	-1.07128	0.123349	0.0664081	-0.332453	-2.25207	0.0943502	-0.123159	-0.763819	-0.0702406	0.217192	-0.4097	0.11196	-0.110869	-0.412795	-2.34434	0	-0.20681	-2.3253	-0.769371	0	-2.41111
P		-0.250629	-0.341034	0.0749746	-2.60564	-0.00472786	-0.514777	-2.40683	-1.12008	-1.99141	-0.368903	-0.123478	-2.0769	-2.24877	-2.23695	-1.1075	0	0.0377336	-0.437253	-1.87422	-0.193553	-2.35468	-2.423	-2.63041	-1.40916	0	-0.235907	0.112942	-2.19644	-1.96921	0.0199831	-0.502644	-2.31203	-1.99319	-0.606754	-2.42846	-0.0227285	0.00744691	-2.55005	-0.213065	-0.0128913	-0.121704	0	-1.44242	-2.16951	-2.47376	-0.677924	-1.09263	-0.465327
Q		-0.476472	-0.0405615	0.144507	-0.271674	-0.137532	-0.206534	-0.350897	-1.11647	-2.53377	-0.463559	-0.506347	0	-0.692494	-3	-2.38472	-1.42922	0.102614	0.024839	-3	0.0125877	-0.0238243	-2.58583	-3	-0.41471	-0.228721	-0.0941678	-0.51632	-3	0.133347	-0.352921	-0.00982387	-3	0.0954548	0.0501777	-0.205771	-0.584106	0.14526	-0.860794	0.0803872	0.173026	-0.103127	-1.19287	-0.652728	-0.136518	-3	-3	-0.00728272	-3
N		-0.369098	-0.277763	-0.403525	0	-0.00188555	-0.149145	-2.13293	-1.26163	-0.508255	-1.9429	-0.508249	-0.572704	-0.357221	-0.652022	-2.32248	-3	0.114456	-0.204989	-0.546973	-0.0649184	-0.0691082	-2.09749	-0.459338	-1.48302	0.0556433	0.0383771	0.15188	-0.292211	0.118966	0.0946314	-0.0328533	-3	-0.274054	-0.0175075	-0.456588	-0.158879	-0.158148	-0.236256	0.15713	-0.216635	-0.648288	-2.30657	-1.02607	-0.782255	-0.805694	-2.54851	-0.313377	-1.89107
T		-0.157373	0	0.0143183	0.0260282	-0.0416246	-0.0612178	-3	-2.06958	-0.710547	0.0124706	-0.939428	-0.83377	-1.74163	-1.79097	-2.41709	-0.901	0.0599408	0	-0.0533967	0.0230989	0.200889	0.17907	0.0208435	0.0161918	0.0144203	-0.107747	0.0637068	-0.348742	0.115366	-0.0822539	0	0.0406759	-0.00569243	0.0184817	-0.184442	0	-0.185102	-0.43971	-0.00995406	-0.0469962	-0.180276	-0.859346	-3	0.0396509	0.0192068	-0.452143	-0.0196553	-0.398284
S		-1.09415	-0.0854883	0.0793939	-0.00439869	0.114313	0.0379727	-2.71414	-2.55412	-1.72265	-0.424193	0.162735	-0.697748	-1.96463	-1.6296	-1.10325	-0.314155	0	0.0778082	-0.773369	0.0280739	0.032664	-0.0210532	-0.0307306	-0.133573	0.0661284	-0.126927	-0.180031	-0.424021	0.11001	0.141509	-0.0249908	-0.636379	0.141774	0	-0.457612	-0.0934175	0	-0.512969	0.00106159	0.00177575	-0.264565	-0.587929	-3	0.0475328	-2.15045	-2.65643	0.122682	0
A		-0.598869	0.0420242	0.0110428	-0.0384557	0.0908347	0.0968802	-1.79069	-2.47819	-2.66642	0.271844	0.141179	-1.13499	-2.14933	-2.53854	-2.08466	-0.814809	0.0745791	0.118351	-0.428758	0.117887	0.0949139	0.137778	0.333136	0.0645736	0.114273	0	0.12259	-0.739055	0.0881658	0.0654472	0.032394	0.0665245	0.115555	0.0724433	-0.401549	-0.300641	-0.0484865	-0.511094	0.174479	0.18822	0.014848	0.0380512	-2.58583	0.156772	0.0822013	-0.0580456	-0.355851	-1.36389
G		-2.28559	-0.601157	-0.300183	-3	-0.166531	0.283804	-0.524461	-3	-3	-3	-0.405157	-2.54051	-2.49112	-2.38275	-0.644855	-3	0.0284912	0.176167	-2.05566	-0.133688	-0.176213	-1.05447	-2.29175	-0.815377	0.0214425	0.063998	0.170372	-0.280932	0.133425	-0.244271	0.0272352	-2.48784	0.269637	0.167015	-3	0.167139	-0.176607	-0.621895	0	0.147576	-3	-1.94582	-0.351002	-1.80929	-2.55991	-3	0.198445	-2.48015
M		0.145585	-0.526335	-0.00449782	0.0504498	-0.0330061	-0.262168	-2.52304	-3	0.13736	-0.0316208	-3	-0.0944291	-2.36203	0.0849633	-2.41894	-3	0.0771663	-0.00126755	-0.145454	0.0248758	0.0884134	-0.0636426	-1.29563	-0.101213	0.0699527	0.0306206	0.171681	-0.408171	0.0624424	-0.152481	-0.215248	-0.0154076	-0.0545508	0.0273588	-0.177722	-0.504479	-0.180001	-3	0.218677	-0.108787	-0.0784263	-1.6399	-0.302708	-0.283753	-0.0943519	-1.19756	-0.0600739	-3
C		-0.467129	-0.042256	0.0214593	-0.295116	-0.0199502	-0.127289	-2.56585	-3	-3	-0.268722	-0.0428908	-0.0689353	-2.43819	-0.434796	-0.378	-0.500814	0.0894288	0.0885188	0.00197911	-0.0908596	0.160424	0	0.707164	0.00649971	0.107894	-0.0139344	-0.232424	-0.834401	0.110679	-0.395519	0.0671708	0.13022	-0.0551792	-0.067028	-0.792501	0.218188	0.0637817	-0.0815167	-0.226362	0.00166151	0.0215376	-0.329562	-3	-0.0750626	-0.271134	-0.206455	-0.0535348	-1.09792
V		-0.141471	0.0513256	0	0.324018	-0.103464	0.305434	-0.564936	-2.36203	-0.589549	-0.170391	-0.453032	-0.534495	-1.15481	-0.10315	-3	-3	0.052097	-0.00464986	-0.0574991	-0.222344	-0.119471	-0.0324347	-0.137617	0.0235013	0.113524	-0.0529177	0.0662193	-0.3159	0.125702	-0.133452	0.052997	0.105976	0.103051	0.0474354	-0.142951	-0.284682	-0.0103079	-0.730591	-0.267106	0.137407	-0.241906	-0.541604	-3	-0.0147504	-0.0760586	-0.0684742	-0.115443	-3
I		0	-0.124129	-0.177203	-0.197467	0.0869333	-0.132239	-3	-2.32602	0	-0.159174	-2.44463	-0.430778	-0.40311	-3	-3	-3	0.0560636	-0.116471	0	-0.0149466	-1.37219	0.320775	0	-0.12501	0.0960585	0.319026	-0.104293	-3	0.109974	0.242669	-0.195037	-0.235407	-0.241367	0.0367728	0	-0.195063	-0.318376	-0.255008	-0.252448	-1.50446	0	-1.79595	-3	0	0	-0.255081	-0.0841589	-3
L		-0.164981	-0.165093	-0.209732	0.274781	-0.0229495	-0.0374222	-2.34036	-0.415412	-0.147408	0	-2.12132	-0.277215	-3	-2.48015	-1.08542	-0.344691	0.0888655	0.0812501	0.1014	0.00994548	0.00285423	-0.118196	0.193787	0	0.00311537	0.155974	-0.2061	-0.472881	0.09342	-0.3156	-0.0302086	-0.220295	0.0182264	0.101873	0.103534	-0.109296	-0.054503	-1.61172	0.0949076	0.137278	0.0639685	-0.376059	-0.564723	-0.0518681	-0.179183	0	-0.213494	-2.02094
Y		-0.176798	-0.1339	0.0805086	-0.39112	-0.0405863	0.316191	-2.6608	-0.153732	-2.58297	-0.0539364	-3	-0.37636	-3	0	-1.72995	-3	-0.0576286	0.0626602	-1.08267	-0.506995	-0.0960357	-0.439665	-2.5318	-1.66255	-0.0177647	0.149558	0.0534973	-0.893331	0.139959	-0.0951485	-2.04353	-0.225266	-0.0822758	-0.325658	-3	0.322371	0.061894	-0.535383	0.00950751	-0.248238	-0.150967	-2.54809	-0.15721	-3	-1.96434	-0.0877393	-0.117208	-1.21179
F		-0.15447	-0.163854	0.387205	-1.26919	-0.115843	0.279412	-3	-0.291038	-0.543441	-0.123048	-2.42846	-2.49689	-2.33982	-0.120904	-3	-3	0.0908642	0.141962	-0.0832125	0.183161	0.277942	-1.18475	-0.267711	0.0132378	-0.315086	0.255515	0	-1.65337	-0.0480779	0.218215	-1.92469	0	-0.193347	-0.133795	-0.433095	0.0537133	0.126124	-1.32474	0.336346	-1.29035	-0.0633736	-3	-0.0275132	-0.514943	-0.223082	-0.345883	-0.129051	-0.467548
W		-0.760197	-0.228229	-0.0639572	0.297025	0.287412	NaN	-3	-0.991409	-3	-2.19338	-3	-3	-3	-0.232341	-3	-3	0.210393	0.037472	-0.692411	0.0733977	-0.264611	-0.438937	-3	-1.31566	-0.278362	-0.140973	-0.0291559	-3	0.0701824	-0.0691889	-2.52595	-0.404092	-0.00824733	-0.421381	-3	0.0422957	-0.135431	-2.25009	-0.450078	-0.25735	-3	-3	-3	-1.5081	-3	-3	-1.44939	-3
[truncated: 270 more columns]
