# Supplementary material for: Allosteric communication in DNA polymerase clamp loaders relies on a critical hydrogen-bonded junction
Source: eLife journal article supplement (doi:10.7554/elife.66181), 2021-04-13
Supplement: supp [file elife-66181-supp-v1.zip › elife_poa_e66181_Source_Data_2.xlsx]

## Sheet: Sheet1
Position:	1	2	3	4	5	6	7	8	9	10	11	12	13	14	15	16	17	18	19	20	21	22	23	24	25	26	27	28	29	30	31	32	33	34	35	36	37	38	39	40	41	42	43	44	45	46	47	48	49
AA	M	S	L	F	K	D	D	I	Q	L	N	E	H	Q	V	A	W	Y	S	K	D	W	T	A	V	Q	S	A	A	D	S	F	K	E	K	A	E	N	E	F	F	E	I	I	G	A	I	N	N
E		-0.176529	-0.0937266	0.0181993	-0.0318267	0.00103276	0.0186468	0.111418	-0.0135913	0.00635395	0.0379466	0	0.0994235	0.0420899	-0.0176906	-0.123973	-0.654201	-0.148799	0.100981	0.0327798	0.0671313	0.0256616	-0.167855	0.0845571	0.0152141	-0.0769133	-0.0570606	0.00171921	-0.836936	0.0472625	0.129628	-0.253214	-0.0529226	0	-0.0242606	-0.0211467	0	-0.112035	0	-0.435921	-0.0923367	0	-0.190299	-0.26276	0.0724032	-0.485112	-0.974187	0.0422931	-0.0862744
D		-0.00086348	-0.0867238	-0.0583286	-0.0541786	0	0	0.0210163	-0.178151	0.0689208	-0.177828	0.0703812	-0.0461104	0.0233263	0.0123835	-0.20079	-0.684742	-0.11101	-0.00404062	0.0504656	0	0.0808699	0.0401617	0.0243453	-0.4242	-0.00243508	0.0994321	-0.0236734	-0.410073	0	0.0872001	-0.355331	-0.0654962	0.0280788	0.0430455	-0.0290512	0.00420427	0.025187	0.0629397	-0.301159	-0.316984	0.0255069	-0.412838	-0.326168	-0.0318568	-0.110848	-0.613608	0.0422626	0.0129784
K		0.0579879	-0.380889	-0.160315	0	-0.0621637	0.0987984	0.0366042	0.0417265	0.0148177	-0.0160401	-0.0103343	0.0276332	0.0103224	-0.051718	0.0064525	-0.853556	0.0276234	0.0741802	0	-0.224238	0.074574	-0.0306918	-0.015661	-0.455378	-0.0105447	0.00438375	-0.0139016	-0.408798	0.0804973	-0.131774	-0.457485	0	0.0378059	0	-0.191447	-0.00275122	0.0267955	0.0579256	-0.211917	-0.0239208	0.037261	-0.0975975	-0.238503	-0.210476	0.0690633	-0.599287	0.173823	-0.0114664
R		0.00502643	-0.0645466	-0.239061	-0.222573	0.0542374	0.0607767	-0.0255097	-0.0337341	-0.129418	0.0201266	0.0143589	-0.177157	-0.71602	0.0393141	0.0531574	-0.0945615	0.0608761	0.0131687	0.0084342	0.0810909	0.124356	-0.0448197	0.0217362	-0.382033	-0.0580346	-0.137878	0.0866192	-0.545199	-0.0138048	0.0382193	-0.509841	0.0169109	0.00731739	-0.0284104	-0.0889053	-0.247711	-0.0230012	-0.335526	-0.290301	0.00306918	-0.128255	-0.209826	-0.317532	-0.00784355	-0.102287	-0.657818	-0.146835	0.0112357
H		0.0114966	0.00236795	-0.0680731	-0.0148477	0.0472017	0.0163192	0.0225377	0.0110344	-0.0079607	-0.0135755	0.0319831	0	0.0133146	0.0705527	0.029013	-0.221223	0.0443005	0.0444819	-0.0801934	0.0782614	0.14101	0.00975202	-0.1269	-0.437208	0.0517582	0.00563714	-0.0175551	-0.497384	0.026538	0.0582729	0.0331256	-0.0970333	-0.0645607	-0.0215389	-0.166995	-0.281893	0.0875004	-0.404687	-0.0454553	0.00260548	-0.124029	-0.195707	-0.0500738	-0.0600583	-0.0977581	-0.708261	-0.0857055	-0.120612
P		0.0807622	-0.18818	-0.173804	-0.0772767	0.0112701	0.0550748	0.0056645	0.0480433	0.0568767	-0.186573	0.0826554	-0.0879107	-0.115782	-0.0142403	0.0861287	-0.817554	-0.236355	0.0376382	0.0376488	-0.575766	0.136534	0.0273344	-0.175902	-0.555889	-0.339312	0.00816875	-0.10957	-0.568933	-0.580131	-0.102024	-0.496456	-0.316527	0.0375738	-0.0287483	0.038901	-0.291853	-0.22475	-0.509843	-0.326617	-0.221257	-0.19097	-0.331791	-0.467562	-0.242143	-0.207761	-0.594195	-0.415412	-0.538959
Q		0.133624	-0.23624	-0.107698	-0.0350333	0.0379366	0.0395974	0.00803908	0	0.0238889	0.108572	-0.0174201	-0.0304321	0	0.0487019	-0.083381	-0.720776	-0.0441961	0.0231649	0.0538734	-0.00705852	0.108065	0.164195	0.0689559	0.0504834	0	-0.0105654	-0.0469946	-0.145583	0.000148392	-0.0137767	-0.170236	0.016303	0.0561049	-0.00398036	-0.0275209	-0.163947	0.0487015	0.0136215	-0.238676	0.0623917	-0.0883717	-0.143201	-0.0797996	-0.020036	-0.137753	-0.575401	-0.163682	0.0380553
N		0.0297827	-0.02502	-0.16509	-0.10721	0.0439961	0.0797983	0.00598743	-0.376971	0.065505	0	0.00767551	0.00750473	0.0955082	0.0970027	0.0539659	-0.767521	-0.00139324	0.037157	-0.0064889	-0.0244415	0.0787149	-0.0217508	0.0236608	-0.541472	-0.0254709	-0.0168111	-0.0262251	-0.504609	0.0181983	-0.0143857	-0.162347	-0.0678289	-0.0369841	0.00169031	-0.199785	-0.324133	0	-0.315244	-0.243269	0.00191098	-0.12813	-0.249888	-0.024756	-0.073826	-0.0719933	-0.115537	0	0
T		0.0506387	-0.0335219	-0.0464101	-0.0215573	0.0460743	-0.163935	0.0235806	0.0461207	0.0431451	-0.065216	-0.218403	0.0316285	0.0497458	0.0824126	0.0490583	-0.816654	0.0284322	0.0520996	0.0289704	0.167212	-0.0673072	0	0.043634	0.0505529	0.0333923	0.0574235	0.0393814	-0.0200131	0.0907284	0.0714701	-0.155092	-0.0281328	-0.0584076	0.0396737	-0.0972059	-0.356027	0.0710508	-0.245055	-0.260422	-0.0523053	-0.0969301	-0.122865	-0.0223767	-0.0142046	-0.139783	-0.250366	0.0452667	-0.0386841
S		0	-0.0999462	-0.0491054	-0.00358264	0.0639291	-0.168651	0.0240839	0.142924	0.0144284	-0.0136669	0.0613569	-0.0139499	0.0242117	-0.126777	0.0544377	-0.589579	-0.0672684	0	-0.0590318	0.0524153	0.121203	-0.0380323	-0.0374939	0.0151423	-0.0217796	0	0.154335	-0.016571	0.0186106	0	-0.143514	0.013223	-0.0513003	0.0428032	-0.0548574	-0.177694	-0.0222288	-0.362938	-0.279096	-0.126727	-0.13736	-0.126369	-0.0424383	-0.0029012	-0.022691	-0.552614	0.019718	0.0030815
A		0.0785882	-0.106623	-0.0817624	0.00713018	0.128815	0.0423829	0.0273429	-0.00611217	0.0219803	0.0559674	-0.228209	0.0495532	-0.0056257	0.0445373	0	-0.506518	0.297202	0.0245181	-0.580955	0.0615159	0.0925008	-0.0113251	0	0.0738095	0.0160925	0.0307538	0	0	0.0265725	-0.0139823	-0.209152	-0.0324583	0.0214237	-0.0178255	0	-0.109571	-0.0157146	0.0245092	-0.173926	-0.0172958	-0.0427012	-0.195529	-0.0318606	-0.0395443	0	-0.285258	-0.0494308	-0.0582097
G		-0.0268479	-0.187046	-0.556404	-0.00172223	0.0868244	0.0413672	0.00682872	-0.106383	-0.0166717	0.0810177	-0.14677	-0.0149879	-0.097941	0.00948327	0.0220679	-0.0911297	-0.0599907	-0.0042479	0	-0.0229928	0.0490376	0.0314809	-0.0336845	0.00923678	-0.0214002	0.034951	0.0433463	-0.0777641	0.0335071	-0.0330968	-0.436507	-0.00290579	-0.0432992	-0.00725009	-0.180241	-0.176826	-0.0869957	-0.0138245	-0.268288	-0.0774455	-0.109388	-0.305748	-0.375782	0	-0.00271717	-0.516406	-0.0588259	-0.0336638
M		-0.17924	0	0.00537909	-0.0175015	0.280297	0.259256	-0.0214972	0	-0.00855754	-0.0252922	-0.0877512	-0.0629651	0.0553741	0.0576024	-0.041891	-0.484019	0.040208	0.0802006	0.00205509	0.0511192	0.0277611	-0.275083	0.0798053	0.020906	-0.0485559	0.0676684	-0.0931004	-0.0090247	-0.157887	-0.038401	-0.060998	-0.0193596	-0.0695527	0.000419607	0.0186568	-0.0701064	0.072014	0	0.0224913	-0.0481752	-0.0773206	-0.0557237	0.0789794	-0.134891	0.119707	0.111428	0.137432	-0.136853
C		-0.0157291	0	-0.0318189	-0.205768	0.0502685	0.0160402	0.00703917	-0.299877	0.0245782	0.0253945	-0.0272669	0.0354536	0.0447574	0.0446432	0.02685	-0.205919	0.0233903	0.0541452	0	0.0460486	0.0345758	0.217684	0.0434125	0.0882471	0.0624974	-0.00459418	0.0457736	0.0250389	-0.0233886	-0.0417671	0.0395694	-0.07203	-0.0041566	0.00377999	-0.149158	-0.143578	0.107928	-0.338554	-0.0863052	-0.0150943	-0.0376546	-0.0733664	-0.034324	-0.0655088	0.0121264	-0.119453	0.0456608	-0.0248852
V		0.00394071	-0.0863509	0.0259892	0.279283	0.040002	0.0101273	0.0143637	0	-0.0170011	-0.00432623	0.0514095	-0.0588531	0.0990898	0	0.0450947	-0.650905	0.116367	-0.00460123	-0.0409391	0.0594145	0.0864531	-0.00288964	0.0120609	0	0.0128445	-0.0261181	-0.0603717	-0.0319369	-0.0452517	-0.0491361	0.018223	-0.0458915	-0.0564461	-0.0950768	-0.0134796	-0.119229	0.0666445	0.0117998	-0.13823	0.0228703	0.0247593	-0.0166484	-0.00244242	-0.0208654	0.00614312	0.0265427	-0.0666721	0.0219163
I		0.028425	0.013302	0.0428584	0.0112339	0.0666636	0.0626136	0	0	0.0425664	0.0206283	0.034483	0.0198225	0.05793	0.0674924	0.0297937	-0.557321	0.0472542	0.0339097	0.0204911	0.0135588	0.0509847	0.0482389	0.101093	0.0193604	-0.0444848	0.0191347	-0.254988	-0.0673864	-0.0102383	0.036004	0.0550462	-0.0487427	-0.0547659	-0.0507598	-0.0804475	-0.187966	0.0968357	-0.181032	-0.0510374	0.000272957	-0.224589	0	0	-0.0798054	-0.00792586	0	0.0926296	-0.00760156
L		0.0163064	0	0.0558851	0.0447592	0.0396291	0.0316022	-0.0123307	0.0355128	0	0.00738081	0.0960613	-0.0356751	0.0604675	0.021414	-0.0107717	-0.236663	-0.0154513	0.0254652	0.0470247	0.0890523	0.0493804	0.0279836	0.0565697	0.0637899	0.0269587	0.0258577	-0.0958746	-0.0480986	0.0595696	0.0144162	0.055982	-0.131938	-0.0551761	0.0336947	0.0639628	-0.135306	0.0620471	-0.275638	-0.0243298	-0.00511404	-0.153987	-0.0954904	0.0397075	0.00958756	0.0410566	0.0472268	-0.0600729	0.0304134
Y		0.0292866	-0.0353681	0	0.0550565	0.0440268	-0.0173221	0.020693	-0.190637	0.0174985	-0.0135797	-0.112355	0.0402497	0.0222178	0.0249998	0.107343	-0.0235024	0	0.00831125	0.0846445	0.0650443	0.0413084	0.0226276	0.0448367	-0.0549621	0.0710757	-0.00774118	0.0129958	-0.350808	0.096307	-0.0191348	0	-0.101096	-0.0744484	-0.0682631	-0.0899367	-0.10681	0.0671808	-0.242779	0	0	-0.153487	-0.121545	0.0467209	-0.0387405	0.0922373	0.00901338	-0.152962	-0.0636051
F		0.0225741	0.265141	0	-0.0287971	0.0457235	-0.0106289	-0.00557494	0.0564524	0.0221625	0.0094931	0.0156429	0.0027297	0.0391474	0.0263609	0.0189774	0.0586504	0	0.0299898	0.0623548	0.0215262	0.0592046	0.0226567	-0.0391221	-0.687769	0.0928191	-0.0606881	-0.0425591	-0.381419	-0.00941514	0.00271141	0	-0.108268	-0.082235	-0.0451938	-0.160768	-0.154765	0.0417823	-0.377044	0	0	-0.105138	-0.0301238	0.110508	-0.0364917	-0.0765984	-0.33949	-0.0293067	0.0151383
W		0.0757978	0	-0.0517575	-0.108193	0.0700212	-0.016782	0.276107	-0.0410924	0.286801	-0.315575	-0.132749	0.416766	-0.00533167	0.113844	-0.0154846	0	0.136173	-0.0475011	0	0.1212	0	0.027731	0.0346155	-0.424983	-0.180732	-0.0340819	-0.07552	-0.221194	-0.0103259	-0.0440106	0.0875132	-0.00315735	0.00135684	-0.0216167	-0.0914468	0.028149	0.0234431	-0.875484	-0.149684	0.190253	0	0.0204839	-0.0799893	-0.181048	-1	-0.386364	0.145449	0.00291006
[truncated: 138 more columns]
