# Supplementary material for: Allosteric communication in DNA polymerase clamp loaders relies on a critical hydrogen-bonded junction
Source: eLife journal article supplement (doi:10.7554/elife.66181), 2021-04-13
Supplement: supp [file elife-66181-supp-v1.zip › elife_poa_e66181_Source_Data_3.xlsx]

## Sheet: Sheet1
Position:	1	2	3	4	5	6	7	8	9	10	11	12	13	14	15	16	17	18	19	20	21	22	23	24	25	26	27	28	29	30	31	32	33	34	35	36	37	38	39	40	41	42	43	44	45	46	47	48	49
AA	M	K	L	S	K	D	T	T	A	L	L	K	N	F	A	T	I	N	S	G	I	M	L	K	S	G	Q	F	I	M	T	R	A	V	N	G	T	T	Y	A	E	A	N	I	S	D	V	I	D
E		-0.960078	-0.47377	-0.144979	-0.0490924	-0.897011	-0.708433	-0.469208	-0.629936	-0.960078	-0.00225425	-0.592701	-0.88639	-0.395797	-0.737856	-0.774531	-0.668332	-0.287933	-0.497722	-0.575835	-0.37817	-0.722606	-0.0923855	0.0477065	-0.785494	-0.309211	-0.643622	-0.826744	-0.763905	-0.764125	-0.853437	-0.181577	-0.36366	-0.960078	-0.770877	-0.88639	NaN	-0.960078	-0.151957	0	-0.0543423	-0.416435	-0.775789	-0.224061	-0.0638351	-0.140075	-0.88014	-0.0647668	0.0447234
D		-0.524739	-0.220564	-0.267167	0	-0.400667	-0.438879	-0.119794	-0.418514	-0.492413	-0.417865	-0.235448	-0.485832	-0.25919	-0.291747	-0.450098	-0.288614	-0.316001	-0.203027	-0.402897	-0.183397	-0.432084	-0.220085	-0.116109	-0.0804242	-0.114188	-0.278527	-0.534745	-0.47958	-0.437227	-0.433798	-0.353864	-0.138551	-0.202403	-0.136269	-0.490423	-0.476977	-0.43576	-0.463542	-0.00873127	-0.392617	-0.00329347	-0.418874	-0.0673056	0	-0.0898734	-0.518317	0	-0.0694086
K		-0.688256	0.0689649	0	0.0967784	-0.521291	-0.0495385	0.27977	0.0867273	-0.615099	0	-0.10158	-0.765114	0.0194271	0.152531	-0.548515	-0.113191	-0.286152	-0.615099	-0.510355	-0.074966	-0.682548	0	0.0699004	-0.543312	-0.0332652	-0.319865	-0.520555	-0.189469	-0.580868	-0.472236	0.101527	-0.318018	-0.0940867	-0.112905	-0.13855	-0.201323	-0.393333	-0.714093	-0.137954	-0.488888	-0.0614443	-0.738278	-0.0190317	-0.960078	-0.0772773	-0.822847	-0.157961	-0.0606354
R		-0.355522	0.095348	-0.0226932	0.147922	-0.36764	0.0757256	0.155924	0.0485255	-0.309337	-0.118049	-0.0772321	-0.423052	-0.153182	0.198173	-0.4083	-0.329464	-0.169808	-0.31034	-0.328367	-0.033826	-0.320128	-0.0189057	-0.00671868	-0.305013	-0.0486748	-0.12274	-0.437725	-0.348733	-0.404014	0	-0.0594439	-0.166688	-0.0209647	-0.0219582	-0.362382	-0.0924547	-0.498237	-0.40509	-0.353272	-0.316891	-0.00909501	-0.340353	0.0310579	-0.39961	-0.0113932	-0.39303	-0.147914	0.0793488
H		-0.356999	0.0909239	-0.150404	0.110121	-0.335692	-0.0156762	0.0579722	-0.0616391	-0.277533	-0.302633	-0.28931	-0.345189	-0.22141	0.058996	-0.186289	-0.264778	-0.0922361	-0.231378	-0.273035	-0.0368222	-0.240641	-0.041707	-0.0837511	-0.32024	-0.0798569	-0.0749887	-0.370471	-0.243524	-0.327018	-0.197829	-0.145933	-0.137544	-0.0591304	-0.0252233	-0.341479	-0.0484394	-0.225347	-0.391003	-0.176172	-0.320134	-0.00243733	-0.267171	-0.000402861	-0.266594	-0.000360928	-0.375456	-0.107984	0.0501852
P		-0.279991	-0.254311	-0.177082	0.0982012	-0.294524	-0.292737	-0.127653	-0.271321	-0.262705	-0.308029	-0.240902	-0.297294	-0.300242	-0.174058	-0.324297	-0.272146	-0.0148606	-0.311043	-0.284628	-0.299737	-0.263004	-0.0916688	-0.0866926	-0.289168	-0.116723	-0.201245	-0.282904	-0.297276	-0.279219	-0.263334	-0.260287	-0.146275	-0.147764	-0.260337	-0.232139	-0.347866	-0.332429	-0.318142	-0.285972	-0.273608	0.0340185	-0.260342	-0.00639795	-0.267276	-0.0734985	-0.284358	-0.160461	-0.251749
Q		-0.161658	-0.238591	-0.282427	-0.022152	-0.471542	0.186265	0.0335162	-0.0866025	-0.508037	-0.487186	-0.19147	-0.647656	-0.28148	0.088497	-0.550787	-0.0719229	-0.18398	-0.308768	-0.403904	0.0904988	-0.469276	-0.182321	-0.0353244	-0.629255	0	-0.200081	-0.189252	-0.445006	-0.455492	-0.411979	-0.336396	-0.265543	-0.208274	-0.2884	-0.584644	0.083739	-0.444608	-0.540594	-0.191799	-0.387876	-0.0314467	-0.518105	-0.0672764	-0.411868	-0.0286051	-0.692316	-0.207093	0.0456729
N		-0.515752	0.0225477	-0.158264	0.0894322	-0.220573	-0.102652	0.000423738	-0.0998004	-0.464477	-0.321122	0	-0.399365	-0.26348	-0.000440864	-0.241034	0	-0.120822	-0.295224	-0.32103	-0.0972627	-0.388584	-0.0577077	0.0554294	-0.347987	-0.0793039	-0.180601	-0.248737	-0.250655	-0.279356	-0.330097	-0.181091	-0.198561	0	0.0101022	-0.417002	-0.0340367	-0.173036	-0.533623	-0.37902	-0.363501	0	-0.340737	0.00501964	-0.0595642	-0.0208586	-0.358258	-0.0580463	-0.0450737
T		-0.359081	0.0218574	-0.138648	0.102065	0	0	0.173085	0.118538	-0.340092	-0.285591	-0.0664701	-0.333424	-0.108151	0	-0.252965	-0.294528	-0.0787113	-0.124626	-0.238158	-0.0602983	-0.317683	-0.0556469	0.0397006	-0.312487	-0.0387657	-0.130716	-0.160621	-0.193888	0	-0.221651	-0.0702179	-0.109699	-0.0753971	-0.289209	0	0	-0.374556	-0.302364	-0.348804	-0.0213999	0.0135995	-0.080631	-0.00678815	-0.213847	0.00240418	-0.268061	0.00542139	-0.0424023
S		-0.358084	0	-0.178703	0.0708041	-0.0183577	-0.0489958	0.0169073	-0.0820182	-0.358788	-0.275524	0.0518681	-0.310354	-0.00641781	-0.00695425	-0.368084	-0.21424	0	-0.00884646	-0.246188	-0.0479645	-0.328105	-0.0914157	0	-0.172006	0.00883051	-0.138543	-0.37192	-0.269564	-0.0650774	-0.232247	-0.0098985	-0.194445	-0.00919527	-0.0069212	-0.118006	0.0550658	-0.382511	-0.105475	-0.0981107	-0.0142542	0.0250428	-0.176994	0	-0.0607328	-0.0106737	-0.276019	-0.103289	-0.0783721
A		-0.360306	-0.0522836	-0.20611	0.0974728	-0.00372297	0.000787676	0	-0.105886	-0.3653	-0.298731	0.0465584	-0.368124	0	0.0386262	-0.380025	-0.259975	-0.0470656	0.00294642	-0.0992377	-0.0549642	-0.335552	-0.103893	-0.0108163	-0.320221	-0.0656693	-0.148523	-0.111405	-0.283743	-0.194356	-0.213451	0	-0.163937	-0.116762	0.0421092	-0.0759175	0.0141343	-0.383703	0	-0.139457	0	0.00835444	-0.27027	0.0015478	-0.252345	-0.0476781	-0.364707	-0.0459249	-0.0614615
G		-0.478952	-0.119628	-0.26906	0.0259397	-0.431192	-0.157668	0.0277105	-0.412924	-0.527167	-0.398691	0.0217715	-0.502825	-0.105255	-0.0369473	-0.484368	-0.40004	-0.301259	0	-0.378501	-0.272751	-0.482033	-0.213505	-0.0600458	0	-0.125789	-0.358154	-0.598043	-0.499147	-0.537483	-0.342454	-0.088842	-0.157083	-0.326164	0	-0.453743	-0.0261292	-0.621853	-0.105192	-0.2308	-0.017374	0.0232364	-0.460654	-0.0502673	-0.091968	-0.168286	-0.506633	-0.061714	-0.201231
M		-0.156314	-0.0703333	-0.449829	-0.0467886	-0.751453	-0.0984236	-0.0791136	-0.0867498	-0.960078	-0.705849	-0.364777	-0.231595	-0.536905	0.0811248	-0.00602245	-0.720343	-0.243377	-0.310373	-0.0910797	0	-0.103281	-0.128308	0.04988	-0.650955	0.0281711	-0.0761336	-0.11282	0	-0.71073	-0.213918	-0.471303	-0.249212	-0.209026	-0.0886611	-0.854414	0.0837059	-0.843285	-0.413397	-0.690648	0.0346835	-0.199786	-0.103353	-0.139668	-0.774531	-0.00305368	-0.159281	-0.220375	-0.17965
C		-0.31871	0.0483465	-0.269864	0.149457	-0.151432	0.0721864	-0.00132267	0.00892165	-0.407347	-0.443446	-0.0532565	-0.41678	-0.204168	-0.16732	-0.42396	-0.321128	-0.171087	-0.147768	-0.0744357	-0.085935	-0.324445	-0.0699497	0.0419385	-0.0863688	-0.0929075	-0.245115	-0.103321	-0.369142	-0.187347	-0.17687	-0.528521	-0.0814588	-0.352641	-0.0247586	-0.139573	-0.0707346	-0.296441	-0.196987	-0.121829	0.000663291	-0.0473351	-0.11866	-0.0342351	-0.131763	-0.00336923	-0.36884	-0.130859	-0.143173
V		-0.211344	-0.22109	-0.26699	0.0727077	-0.202461	-0.165883	0.0396425	0.131969	-0.47578	-0.496746	-0.12653	-0.398411	-0.0820761	0.0179961	0.00816634	-0.4431	-0.272886	-0.09399	-0.0467271	-0.0669413	-0.290026	-0.0505021	0.0258747	-0.251555	-0.22713	-0.175765	0.0264183	-0.0317353	-0.275687	-0.117106	-0.216006	0	-0.324178	-0.197957	-0.184096	-0.105361	-0.36481	-0.0276564	-0.318289	-0.192402	-0.0503398	-0.0622586	-0.0107862	-0.128823	0	-0.0543399	-0.147162	-0.200256
I		-0.277712	-0.200609	-0.2289	0.0938973	-0.309765	-0.109585	0.0833277	0.124948	-0.141027	-0.383588	-0.213319	-0.184969	-0.38706	-0.0158207	0	-0.364342	-0.305792	-0.434385	0	-0.0300192	-0.15261	-0.0796223	0.0569573	-0.436929	-0.298398	-0.136067	0	-0.0814297	-0.243663	-0.0821889	-0.433771	0.0326957	-0.14439	-0.435958	-0.262642	0.0190249	-0.426394	-0.449915	-0.38941	-0.38192	-0.0417584	0	-0.0568463	-0.436016	0.0067682	0	-0.382852	-0.166046
L		0	-0.030858	-0.201953	0.0891043	-0.318904	-0.0926367	0.00842734	0	0	-0.326044	-0.283007	-0.108445	-0.354908	-0.0617231	-0.0320036	-0.331694	-0.204295	-0.34259	-0.105133	0.000331448	0	-0.0470668	5.99526e-05	-0.358514	-0.102004	-0.0629474	-0.0845144	-0.210955	-0.349166	-0.105295	-0.364741	-0.147827	-0.0550365	-0.133124	-0.375428	-0.126559	-0.386136	-0.39015	-0.341464	-0.318694	-0.0260533	-0.0860755	-0.0257321	-0.404473	0.00697932	-0.044525	-0.115308	-0.166236
Y		-0.120096	-0.206983	-0.313575	0.0766084	-0.414088	-0.229881	-0.104881	-0.245879	-0.182865	-0.487161	-0.205972	NaN	-0.555489	-0.0667283	-0.172542	-0.463659	-0.174971	-0.4881	-0.311697	-0.0363121	-0.112818	-0.146033	-0.0682808	-0.430271	-0.470898	NaN	-0.397112	-0.38462	-0.437715	-0.169898	-0.510746	-0.227269	-0.395061	-0.0834923	-0.487318	-0.282795	0	-0.504572	-0.432172	-0.393295	-0.0264534	-0.279195	-0.0514124	-0.469628	-0.0394616	-0.155048	-0.383645	NaN
F		-0.258035	-0.0744374	-0.255637	-0.0104912	-0.412657	-0.23988	0.0304468	-0.161125	-0.455603	-0.44594	0.0132935	0	-0.337426	0.0505809	-0.331001	-0.235694	-0.0900182	-0.466743	-0.398113	0.00421304	-0.38977	-0.0717346	-0.0522279	-0.403675	-0.232718	0	-0.546667	-0.368517	-0.431681	-0.205312	-0.479766	-0.228906	-0.0895651	-0.000375265	-0.476654	-0.43836	NaN	-0.454145	-0.459927	-0.368614	-0.038179	-0.387956	-0.0504696	-0.152752	0.016272	-0.524478	-0.18604	0
W		-0.203677	-0.523263	-0.474618	-0.793411	-0.748345	0.0168846	-0.483186	-0.365406	-0.749274	-0.676652	-0.250511	-0.0235035	-0.812701	-0.574658	-0.904311	-0.776764	-0.488926	-0.774531	-0.761653	-0.293411	-0.543264	-0.157118	-0.294306	-0.758229	-0.539458	-0.00720868	-0.820738	-0.70698	-0.960078	-0.314365	-0.902156	-0.614195	-0.779919	-0.129596	-0.892146	-0.839795	-0.831127	-0.656893	-0.960078	-0.550421	-0.126986	-0.751453	-0.33591	NaN	-0.0736216	-0.749768	-0.694583	0.166753
[truncated: 179 more columns]
