# Supplementary figures and images for: Allosteric communication in DNA polymerase clamp loaders relies on a critical hydrogen-bonded junction
Source: eLife journal article supplement (doi:10.7554/elife.66181), 2021-04-13

| Figure 3 – Supplement 1  A | |
| --- | --- |
| B | 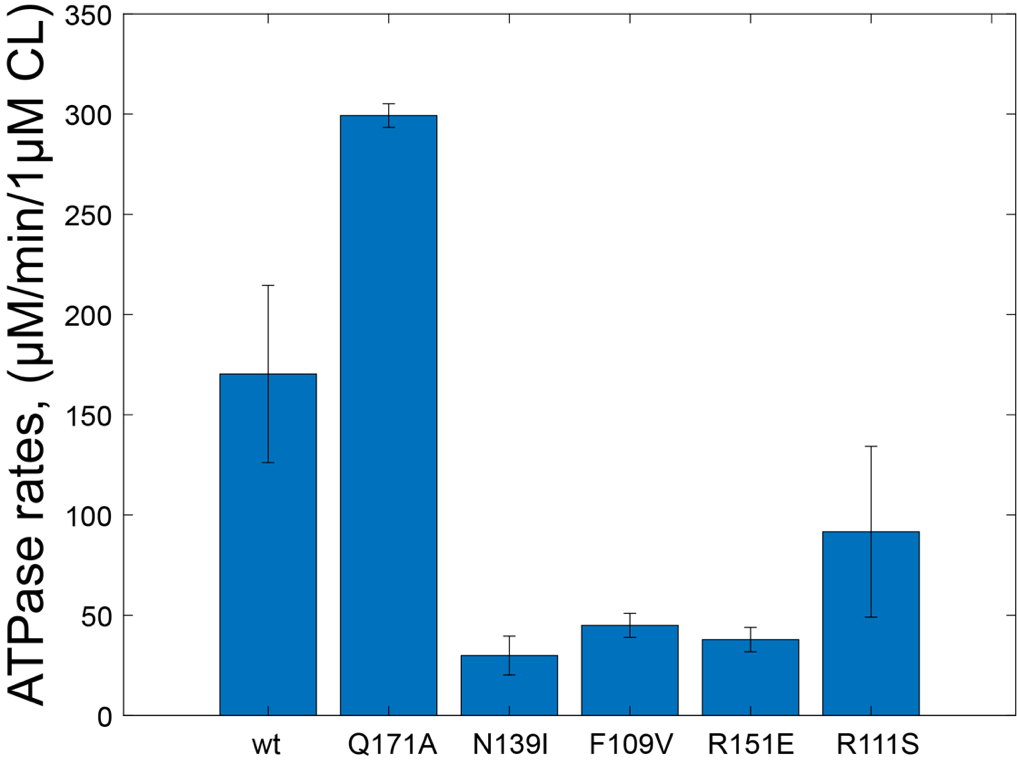 |
|  | 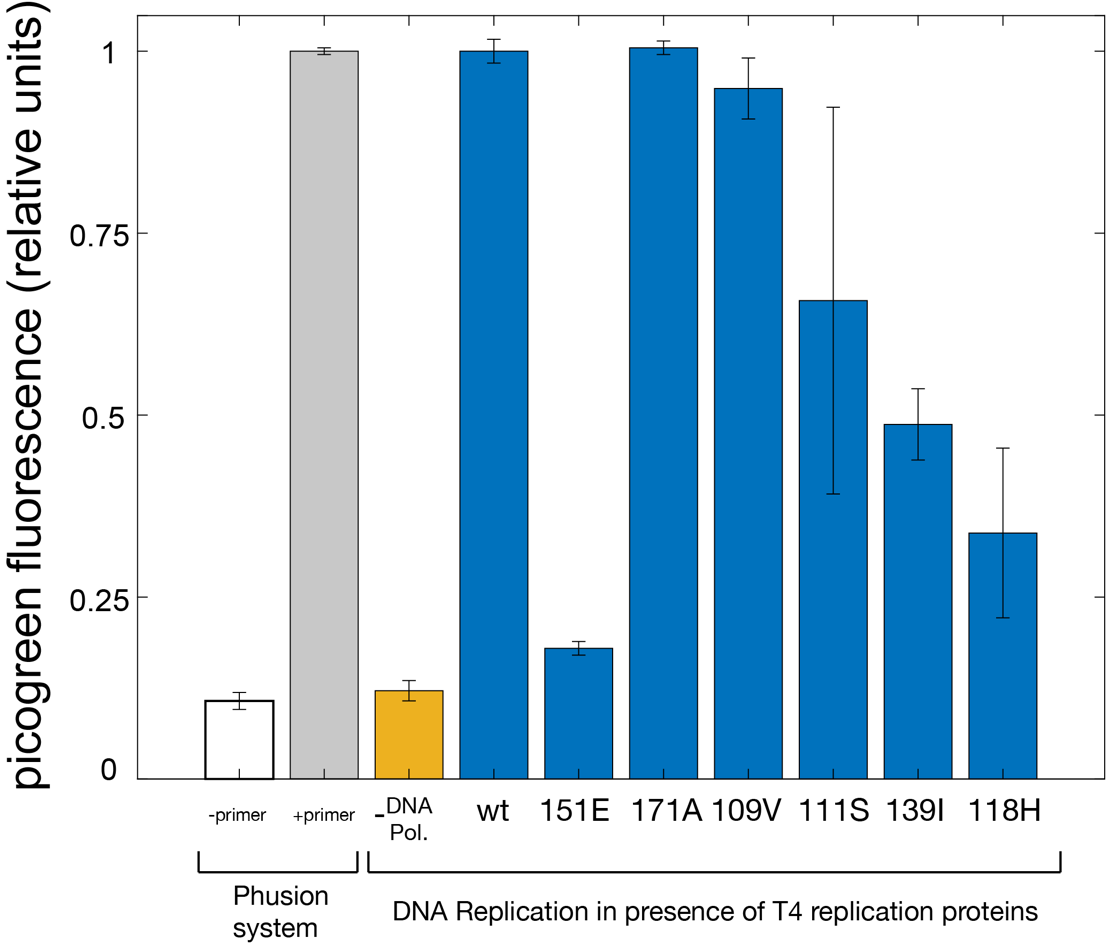 |

Supplement: supp [file elife-66181-supp-v1.zip › elife_poa_e66181_Figure_3_figure_supplement_1.docx]

| Figure 4 – Supplement 1 |
| --- |
| Mutational sensitivity of the sliding clamp  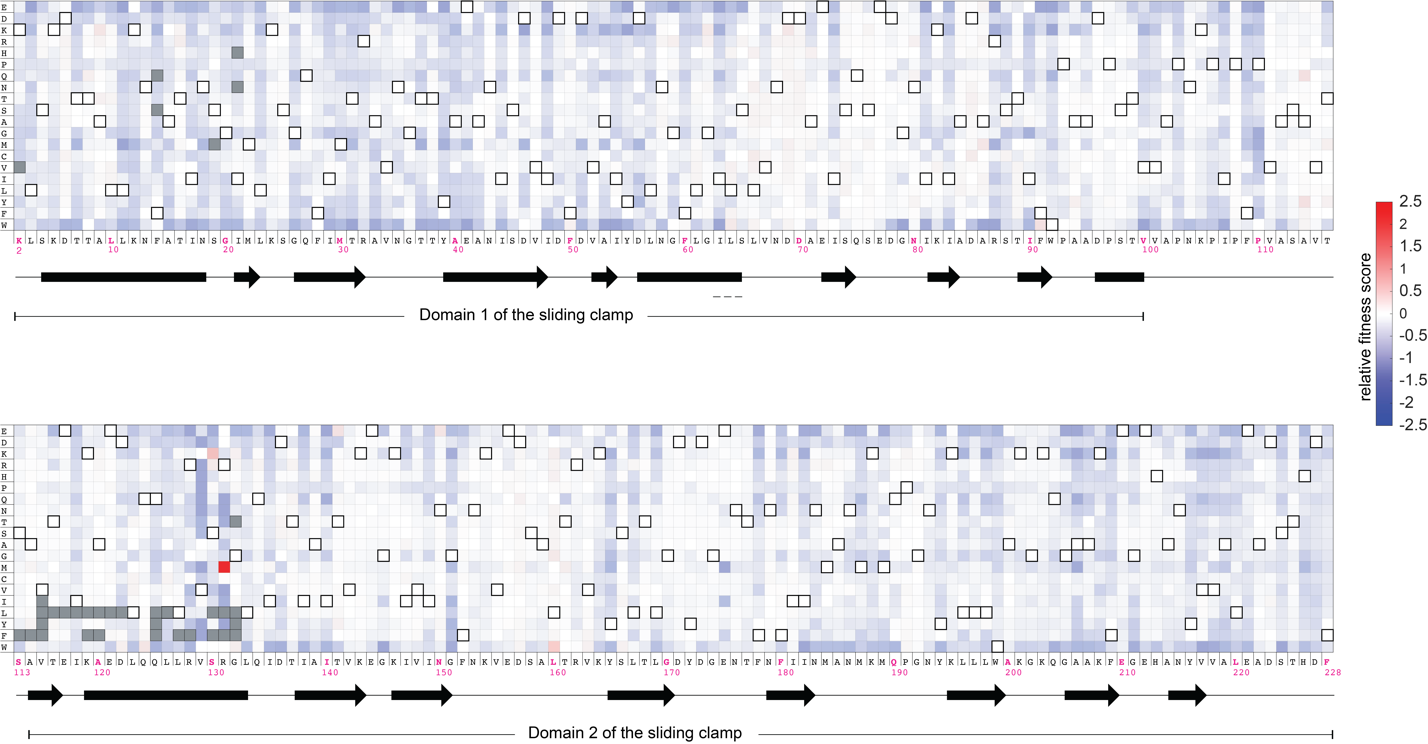 |
|  |

Supplement: supp [file elife-66181-supp-v1.zip › elife_poa_e66181_Figure_4_figure_supplement_1.docx]

| Figure 4 – Supplement 2 |
| --- |
| Mutational sensitivity of the clasp subunit  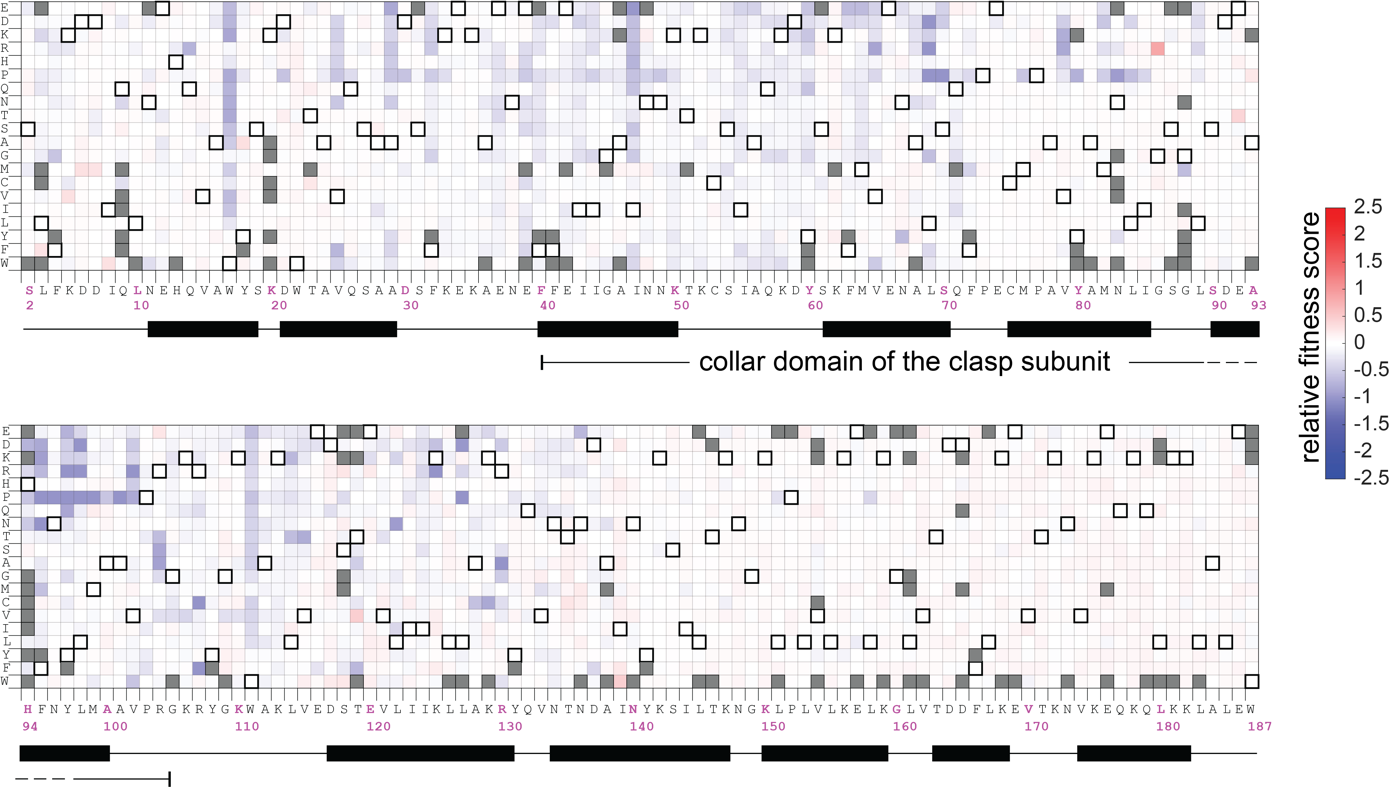 |
|  |

Supplement: supp [file elife-66181-supp-v1.zip › elife_poa_e66181_Figure_4_figure_supplement_2.docx]

| Figure 4 – Supplement 3 |
| --- |
| Mutational sensitivity of the collar domain of the ATPase subunit  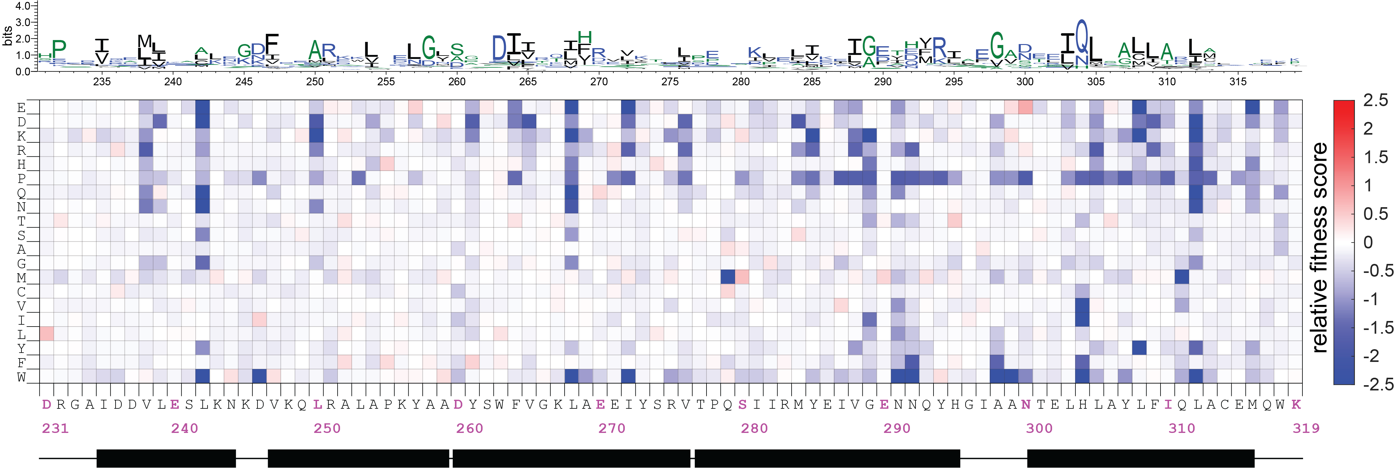 |
|  |

Supplement: supp [file elife-66181-supp-v1.zip › elife_poa_e66181_Figure_4_figure_supplement_3.docx]

| Figure 5 – supplement  A | |
| --- | --- |
|  | 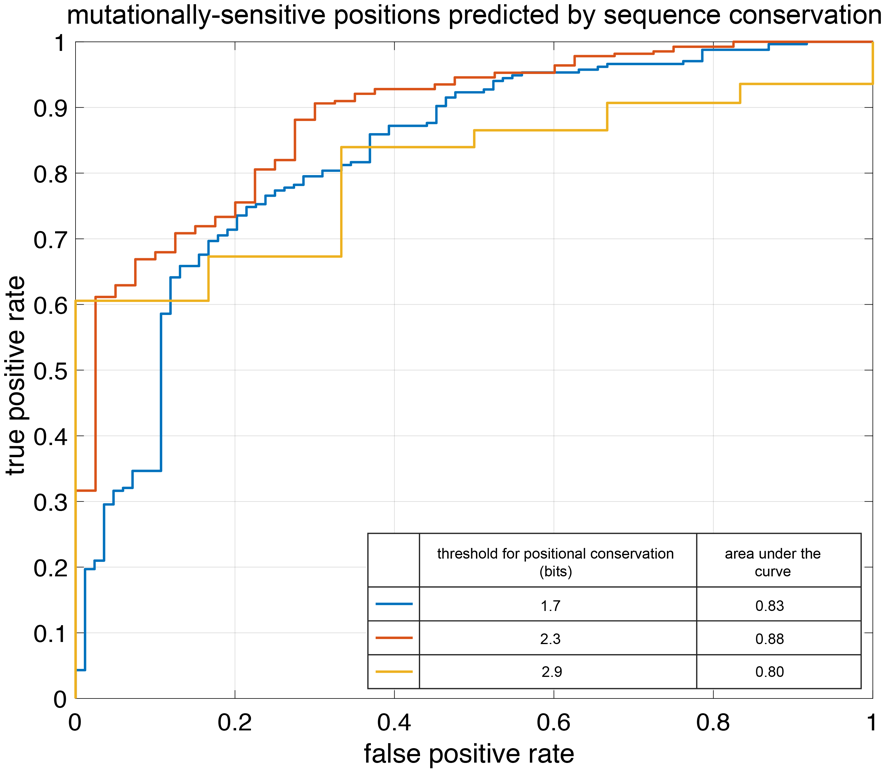 |
| B | 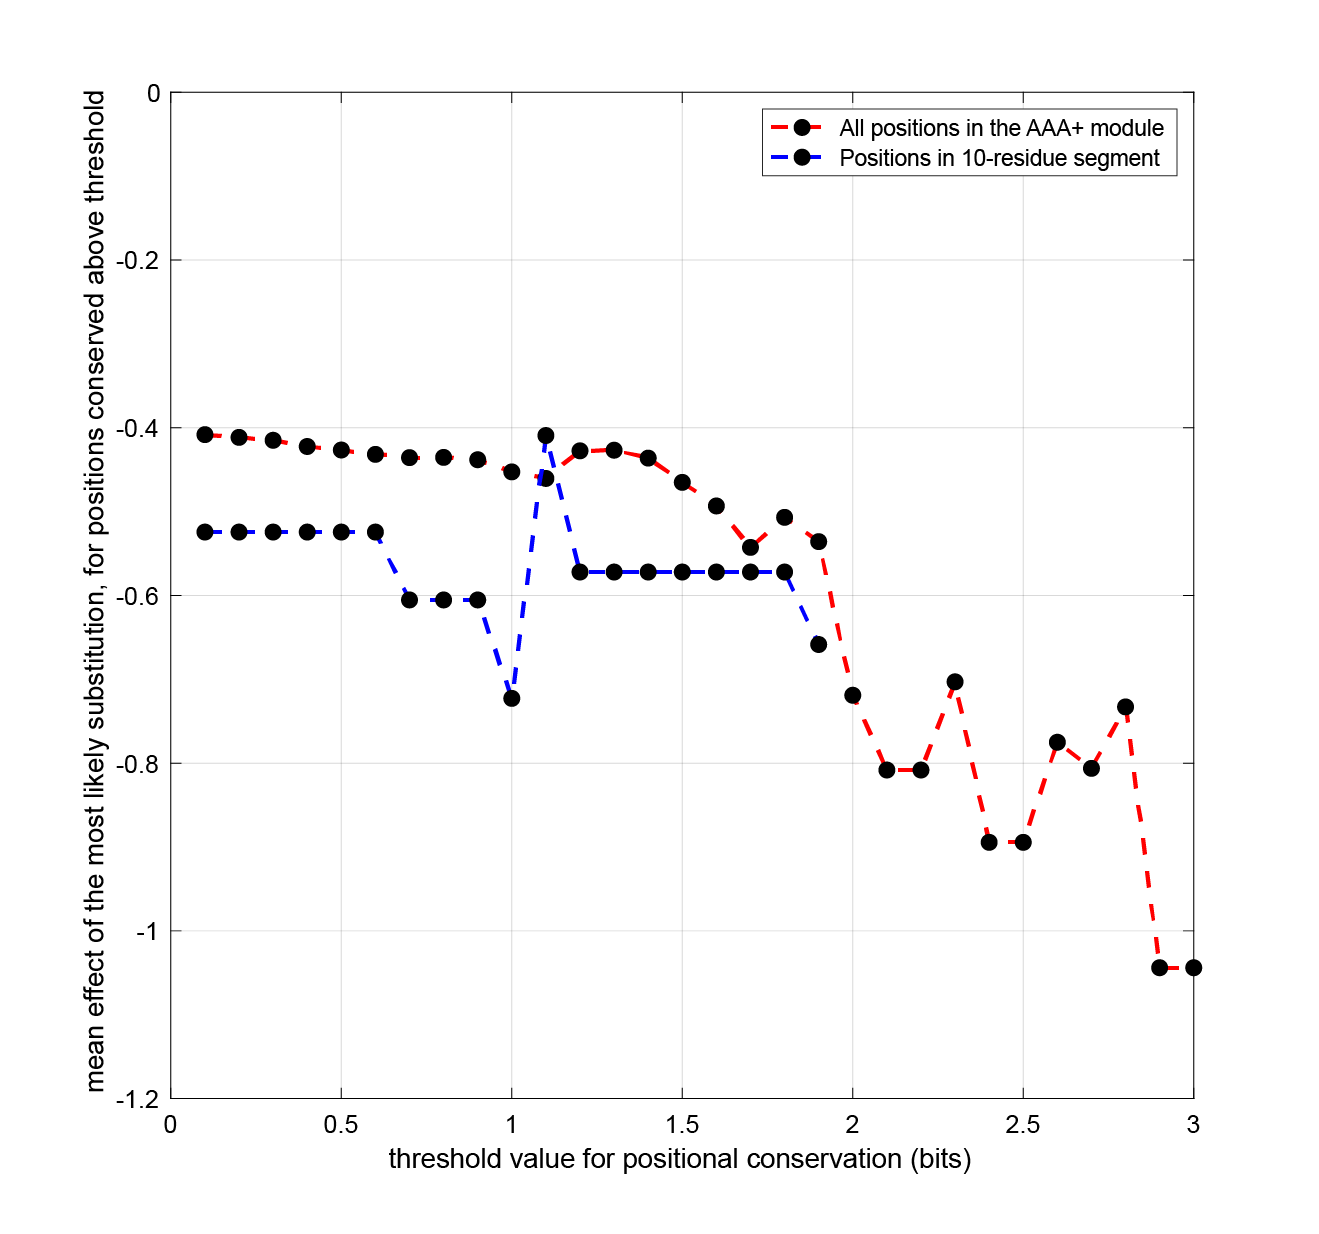 |

Supplement: supp [file elife-66181-supp-v1.zip › elife_poa_e66181_Figure_5_figure_supplement_1.docx]

| Figure 6 - supplement 1 | |
| --- | --- |
|  | 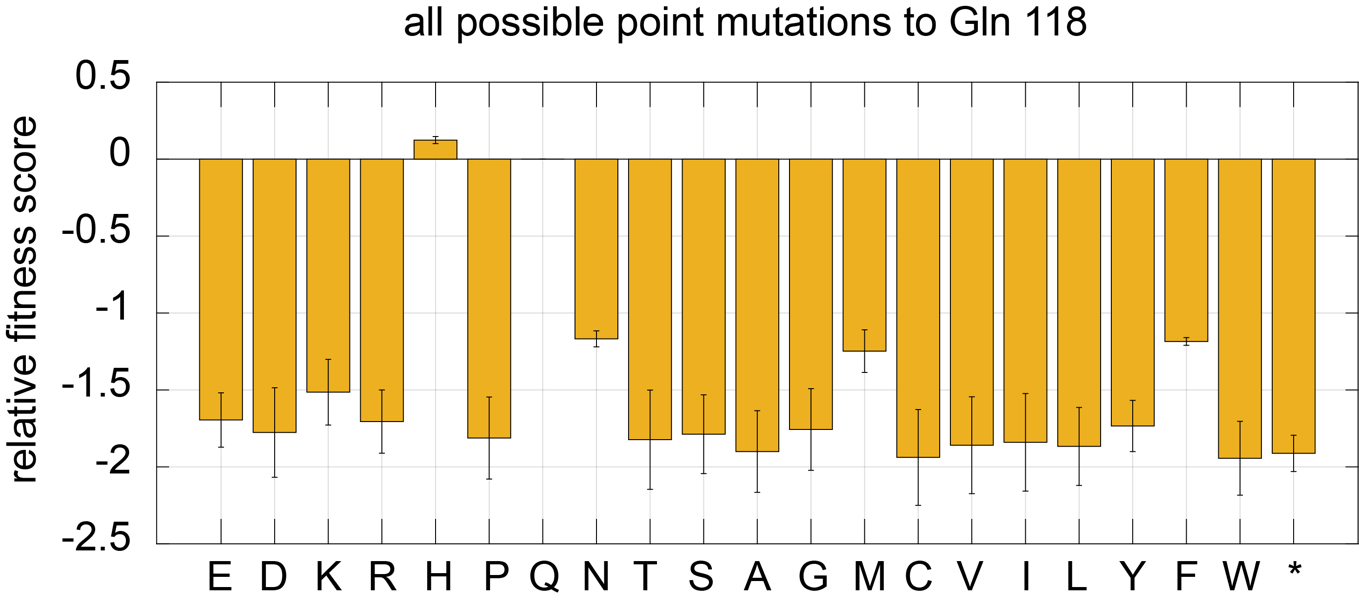 |

Supplement: supp [file elife-66181-supp-v1.zip › elife_poa_e66181_Figure_6_figure_supplement_1.docx]

| Figure 6 - supplement 2 | |
| --- | --- |
|  | 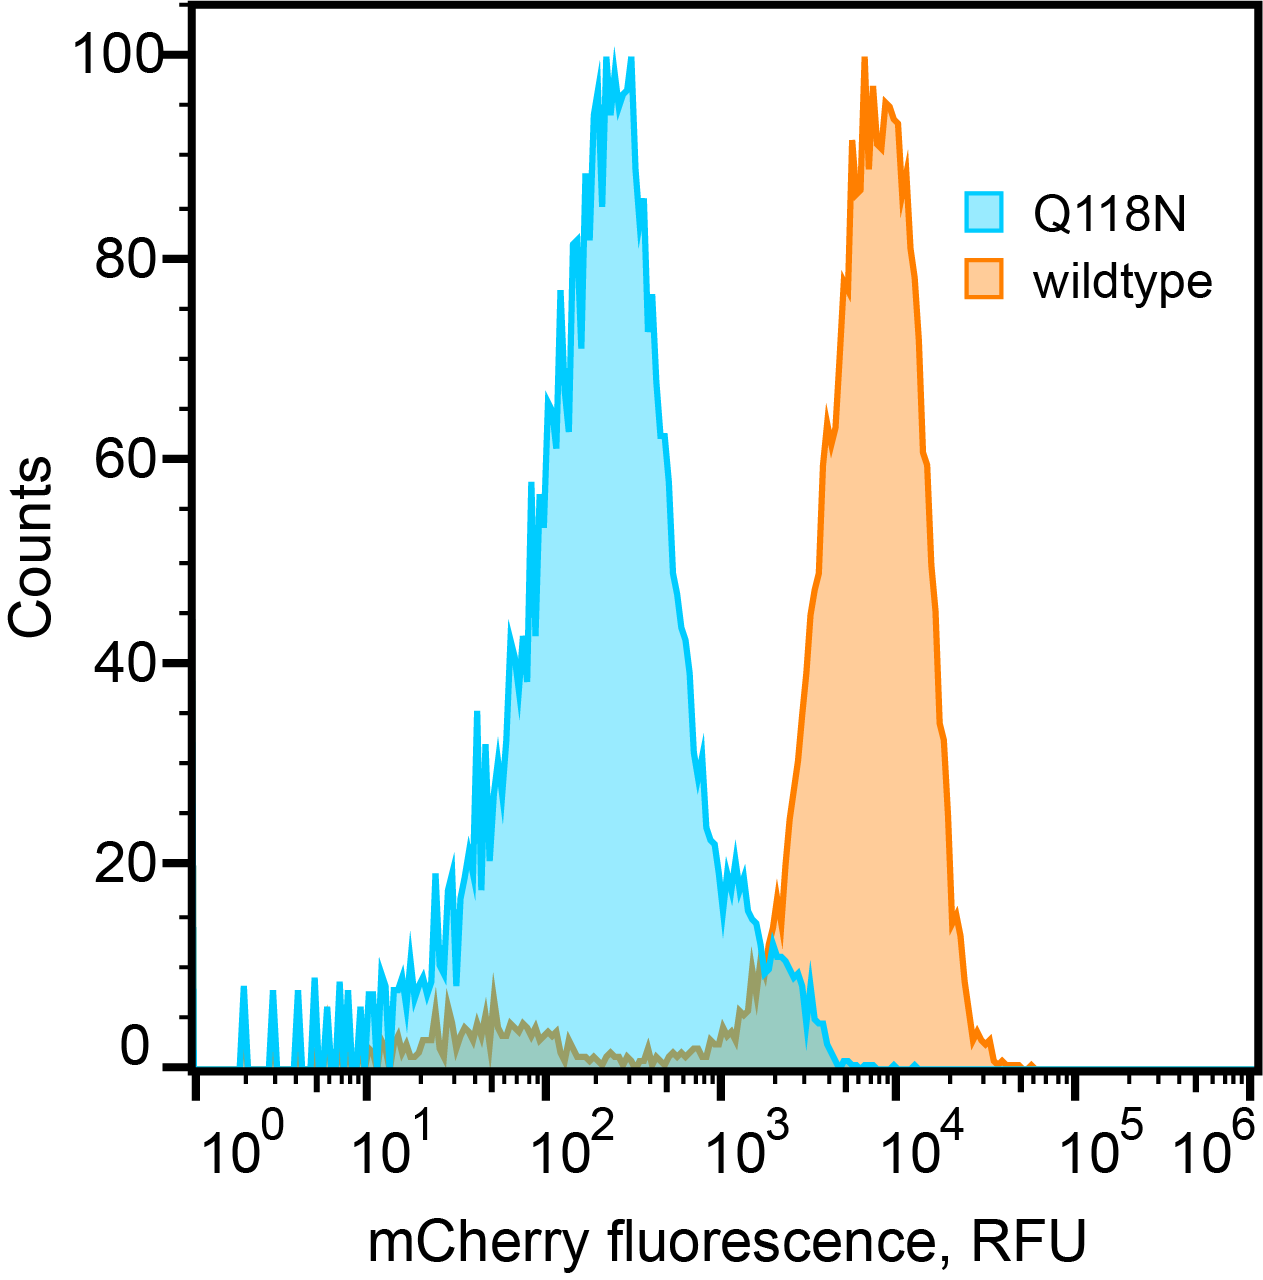 |

Supplement: supp [file elife-66181-supp-v1.zip › elife_poa_e66181_Figure_6_figure_supplement_2.docx]

| Figure 9 - supplement 1  G  E  C | |
| --- | --- |
| 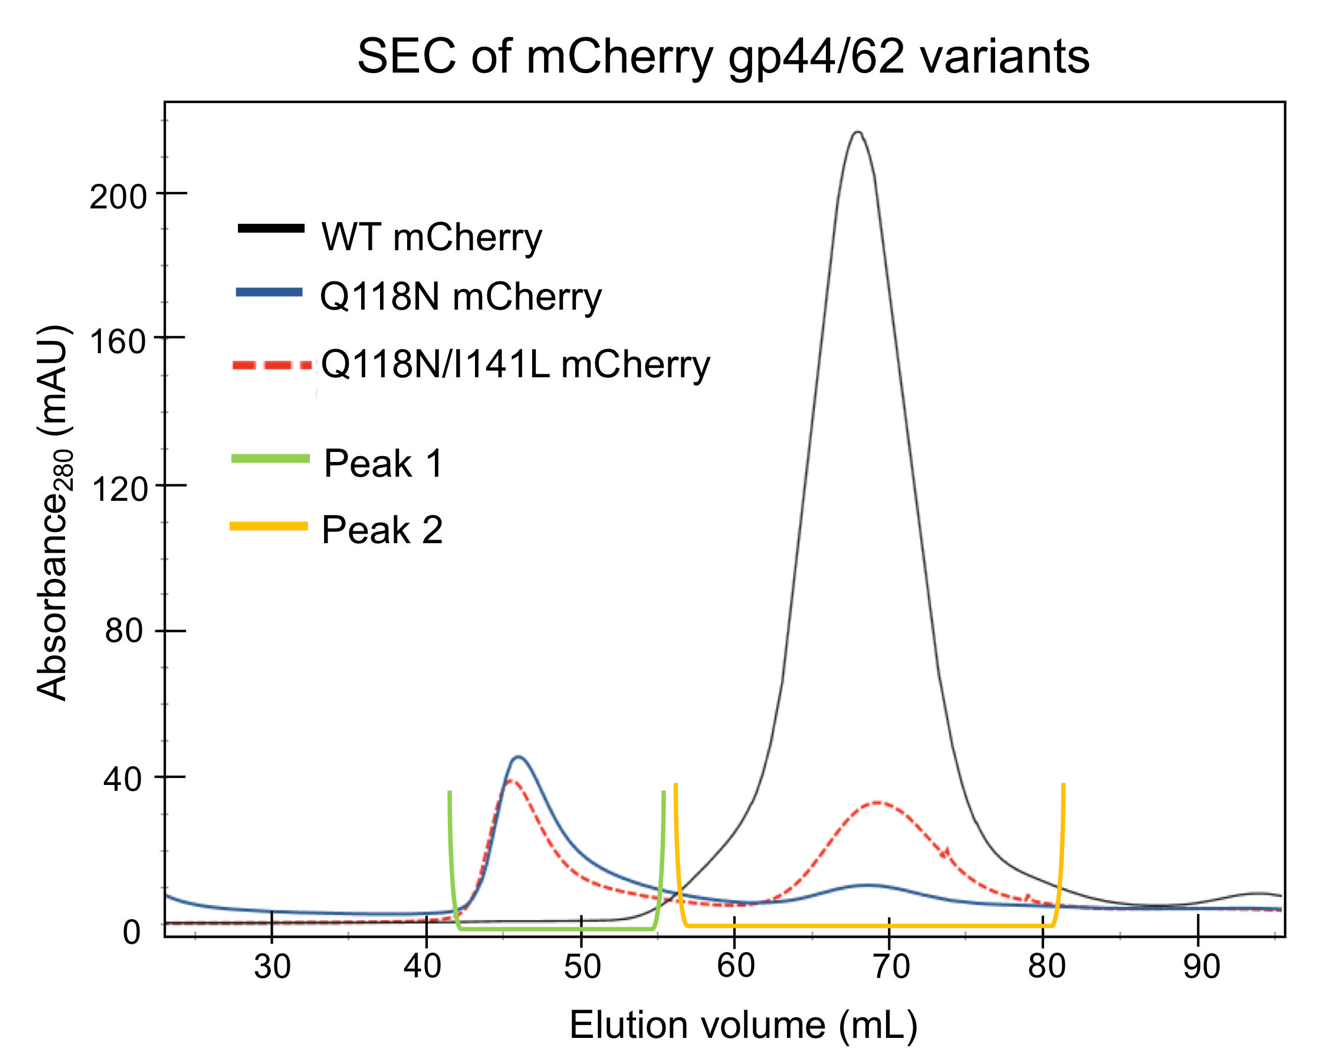 |

Supplement: supp [file elife-66181-supp-v1.zip › elife_poa_e66181_Figure_9_figure_supplement_1.docx]

| Figure 9 - supplement 2 | |
| --- | --- |
| 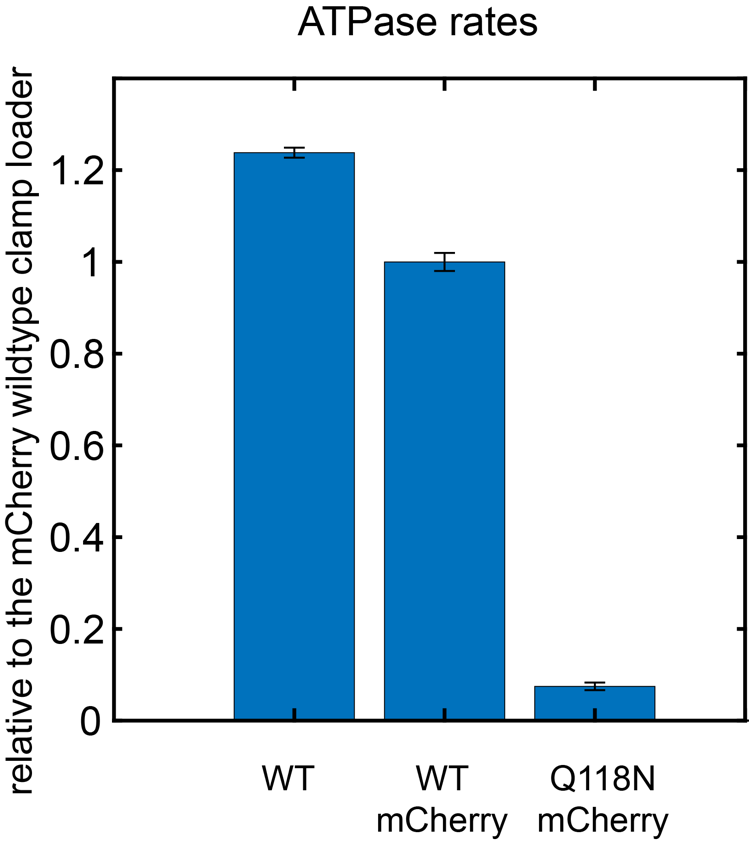 |

Supplement: supp [file elife-66181-supp-v1.zip › elife_poa_e66181_Figure_9_figure_supplement_2.docx]

| Figure 9 - supplement 3 | |
| --- | --- |
| 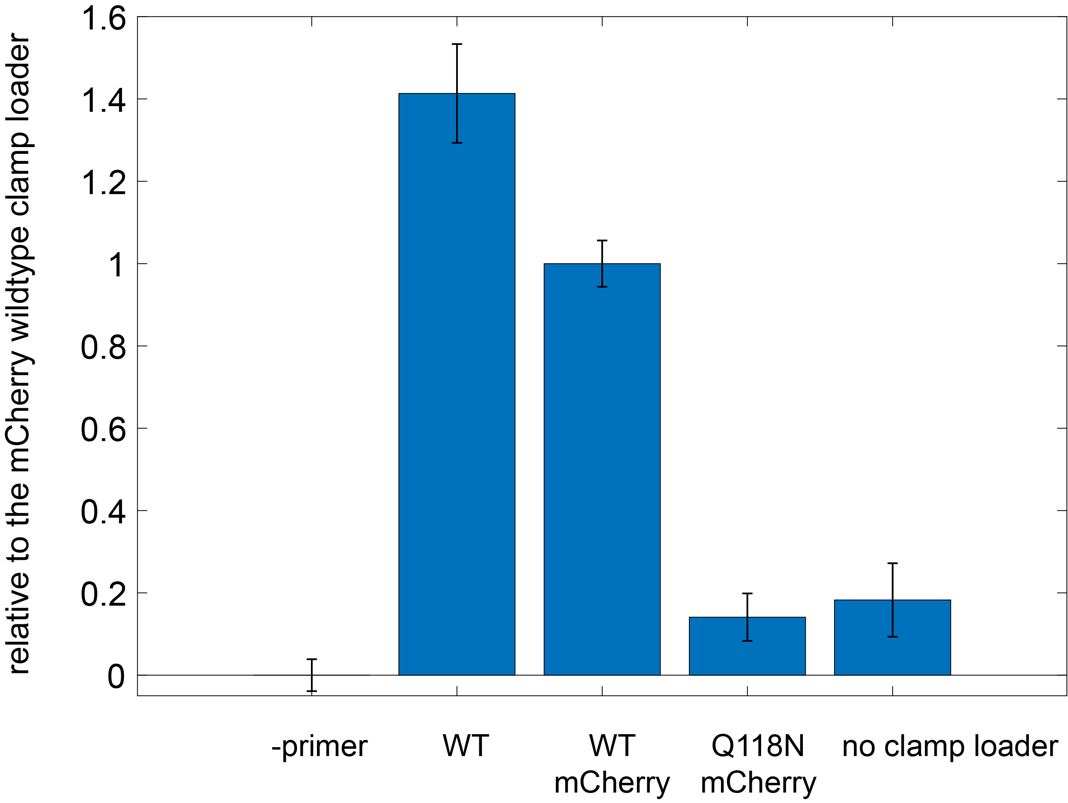 |

Supplement: supp [file elife-66181-supp-v1.zip › elife_poa_e66181_Figure_9_figure_supplement_3.docx]
